# Supplementary material for: Photophysical properties and excited-state dynamics of donor–acceptor–heavy-atom molecules and their application in triplet–triplet annihilation upconversion
Source: Royal Society of Chemistry journal article supplement (doi:10.1039/d4tc00491d), 2024-01-01
Supplement: d4tc00491d1.pdf [file d4tc00491d1.pdf]

Electronic Supplementary Information (ESI):

## **Photophysical properties and dynamics of donor–acceptor–heavy-atom molecules and their application in triplet–triplet annihilation upconversion**

Jun Ho Yoon,<sup>†a</sup> Jeong-Min Park,<sup>†b</sup> Jae Moon Lee,<sup>a</sup> Hong Mo Kim,<sup>a</sup> Woo Jin Choi,<sup>a</sup> Hyun Kyu Lee,<sup>a</sup> Suhyeon Kim,<sup>a</sup> Wan Soo Kim,<sup>a</sup> Min Sung Kim,<sup>a</sup> Yoo Sang Kim,<sup>a</sup> Dong Jun Lee,<sup>a</sup> Yoona Noh,<sup>c</sup> Juwon Oh,<sup>\*c</sup> Jae-Hyuk Kim<sup>\*b</sup> and Jae Pil Kim<sup>\*a</sup>

<sup>a</sup> *Department of Materials Science and Engineering, Seoul National University, Seoul, 08826, Republic of Korea*

<sup>b</sup> *Department of Civil and Environmental Engineering, Pusan National University, Pusan, 46241, Republic of Korea*

<sup>c</sup> *Department of Chemistry, Soonchunhyang University, Asan, 31538, Republic of Korea*

<sup>†</sup> *These authors contributed equally to this work.*

<sup>\*</sup> *Corresponding author.*

E-mail: jaepil@snu.ac.kr

## Table of contents

|                                                                |         |
|----------------------------------------------------------------|---------|
| 1. Synthesis procedures.....                                   | Page 3  |
| 2. UV-vis absorption spectra.....                              | Page 14 |
| 3. Fluorescence emission spectra.....                          | Page 15 |
| 4. Singlet oxygen quantum yield (SOQY) measurement.....        | Page 17 |
| 5. Electrochemical characterization.....                       | Page 18 |
| 6. fs-to- $\mu$ s Transient absorption spectroscopy.....       | Page 19 |
| 7. Density functional theory (DFT) calculation.....            | Page 20 |
| 8. Spin-orbit coupling matrix element (SOCME) calculation..... | Page 27 |
| 9. Triplet-triplet annihilation upconversion (TTA-UC) .....    | Page 27 |

## 1. Synthesis procedures

### Synthesis of PY-BDP

A solution of 1-pyrenecarboxaldehyde (2.30 g, 9.988 mmol, 1 eq) and 2,4-dimethylpyrrole (3.08 mL, 29.966 mmol, 3 eq) in dry CH<sub>2</sub>Cl<sub>2</sub> (550 mL) was mixed with a solution of trifluoroacetic acid (153.05  $\mu$ L, 2 mmol) in dry CH<sub>2</sub>Cl<sub>2</sub> (10 mL) at room temperature under N<sub>2</sub> atmosphere. After 1.5 h, p-chloranil (2.22 g, 9 mmol) was added while cooling on ice and stirred for 10 min. After another hour, triethylamine (8 mL) was added followed by BF<sub>3</sub>·Et<sub>2</sub>O (8 mL), and the mixture was stirred for an additional 2 h before being poured into water. After extraction, the organic layer was dried over anhydrous MgSO<sub>4</sub>, and then evaporated under reduced pressure to obtain the crude product. To purify the crude product, column chromatography was performed using silica gel and a mixture of CH<sub>2</sub>Cl<sub>2</sub>/*n*-hexane (2:1, v/v) as the eluent. This process resulted in the production of orange solid PY-BDP, with a yield of 12% (537 mg). <sup>1</sup>H NMR (500 MHz, Chloroform-d):  $\delta$  (ppm) 8.50–8.48 (d, J=7.85 Hz, 1H), 8.41–8.39 (d, J=7.55 Hz, 1H), 8.35–8.33 (d, J=7.25 Hz, 1H), 8.31 (s, 2H), 8.24–8.22 (d, J=9.20 Hz, 1H), 8.16–8.12 (t, J=7.65 Hz, 1H), 8.05–8.04 (d, J=7.85 Hz, 1H), 7.86–7.84 (d, J=9.15 Hz, 1H), 6.16 (s, 2H), 2.50 (s, 6H), 0.83 (s, 6H). <sup>13</sup>C NMR (850 MHz, Chloroform-d):  $\delta$  (ppm) 155.29, 142.53, 140.33, 131.47, 131.38, 130.75, 130.36, 129.27, 128.43, 128.33, 127.30, 126.84, 126.10, 125.98, 125.90, 125.71, 123.81, 123.62, 123.13, 121.53, 40.00, 39.83, 39.66, 39.49, 39.33, 39.16, 38.99, 14.31, 13.31. GC/HRMS (EI) calculated for C<sub>29</sub>H<sub>23</sub>BF<sub>2</sub>N<sub>2</sub>: 448.1922, found: 448.1923.

### Synthesis of PY-BDP-2Cl

N-Chlorosuccinimide (NCS) (27 mg, 0.200 mmol, 5 eq) in CH<sub>2</sub>Cl<sub>2</sub> (6 mL) was slowly added dropwise to PY-BDP (18 mg, 0.040 mmol) in 10 mL of dry CH<sub>2</sub>Cl<sub>2</sub> within 0.5 h. The resulting mixture was stirred for an additional 12 h, washed with a sodium chloride aqueous solution, and extracted with CH<sub>2</sub>Cl<sub>2</sub>. The organic layers were combined, dried with MgSO<sub>4</sub>, and then evaporated until dryness. The orange solid product PY-BDP-2Cl was obtained with a 40% yield (8.25 mg) through column chromatography

on silica gel, using CH<sub>2</sub>Cl<sub>2</sub>/*n*-hexane (3:2, v/v) as the eluent. <sup>1</sup>H NMR (500 MHz, Chloroform-d): δ (ppm) 8.32–8.30 (d, J=6.50 Hz, 1H), 8.29–8.28 (d, J=6.30 Hz, 1H), 8.24–8.23 (d, J=6.10 Hz, 1H), 8.21–8.20 (d, J=7.45 Hz, 1H), 8.16–8.15 (d, J=7.45 Hz, 1H), 8.09–8.06 (m, 2H), 7.95–7.93 (d, J=7.60 Hz, 1H), 7.85–7.84 (d, J=6.45 Hz, 1H), 2.65 (s, 6H), 0.87 (s, 6H). <sup>13</sup>C NMR (850 MHz, Chloroform-d): δ (ppm) 152.98, 141.70, 138.26, 132.29, 131.47, 131.15, 130.67, 129.59, 129.42, 128.93, 128.48, 127.45, 126.90, 126.30, 126.17, 125.74, 125.64, 124.89, 124.65, 123.84, 122.92, 122.89, 77.44, 77.23, 77.01, 12.74, 11.61. GC/HRMS (EI) calculated for C<sub>29</sub>H<sub>21</sub>BCl<sub>2</sub>F<sub>2</sub>N<sub>2</sub>: 516.1142, found: 516.1140.

### Synthesis of PY-BDP-2Br

N-Bromosuccinimide (NBS) (133 mg, 0.749 mmol, 3 eq) in CH<sub>2</sub>Cl<sub>2</sub> (10 mL) was slowly added dropwise to PY-BDP (112 mg, 0.249 mmol) in 25 mL of dry CH<sub>2</sub>Cl<sub>2</sub> within 0.5 h. The resulting mixture was stirred for an additional 12 h, washed with a sodium chloride aqueous solution, and extracted with CH<sub>2</sub>Cl<sub>2</sub>. The organic layers were combined, dried with MgSO<sub>4</sub>, and then evaporated until dryness. The purple solid product PY-BDP-2Br was obtained with a 46% yield (69.41 mg) through column chromatography on silica gel, using CH<sub>2</sub>Cl<sub>2</sub>/*n*-hexane (1:1, v/v) as the eluent. <sup>1</sup>H NMR (500 MHz, Chloroform-d): δ (ppm) 8.32–8.30 (d, J=7.85 Hz, 1H), 8.29–8.28 (d, J=7.60 Hz, 1H), 8.24–8.22 (d, J=7.45 Hz, 1H), 8.21–8.20 (d, J=8.95 Hz, 1H), 8.16–8.15 (d, J=8.95 Hz, 1H), 8.09–8.06 (m, 2H), 7.95–7.93 (d, J=9.10 Hz, 1H), 7.85–7.84 (d, J=7.75 Hz, 1H), 2.67 (s, 6H), 0.88 (s, 6H). <sup>13</sup>C NMR (850 MHz, Chloroform-d): δ (ppm) 154.40, 141.41, 140.90, 132.30, 131.48, 131.41, 131.16, 129.61, 129.41, 128.93, 128.63, 127.45, 126.90, 126.31, 126.18, 125.71, 125.67, 124.91, 124.66, 123.85, 112.08, 112.06, 77.48, 77.22, 76.97, 29.92, 29.90, 14.01, 13.36. GC/HRMS (EI) calculated for C<sub>29</sub>H<sub>21</sub>BBr<sub>2</sub>F<sub>2</sub>N<sub>2</sub>: 604.0132, found: 606.0118.

### Synthesis of PY-BDP-2I

N-Iodosuccinimide (NIS) (55 mg, 0.245 mmol, 5 eq) in CH<sub>2</sub>Cl<sub>2</sub> (8 mL) was slowly added dropwise to PY-BDP (20 mg, 0.049 mmol) in 10 mL of dry CH<sub>2</sub>Cl<sub>2</sub> within 0.5 h. The resulting mixture was stirred

for an additional 12 h, washed with a sodium chloride aqueous solution, and extracted with CH<sub>2</sub>Cl<sub>2</sub>. The organic layers were combined, dried with MgSO<sub>4</sub>, and then evaporated until dryness. The red solid product PY-BDP-2I was obtained with a 68% yield (23.32 mg) through column chromatography on silica gel, using CH<sub>2</sub>Cl<sub>2</sub>/*n*-hexane (2:1, v/v) as the eluent. <sup>1</sup>H NMR (500 MHz, Chloroform-*d*): δ (ppm) 8.32–8.30 (d, J=7.90 Hz, 1H), 8.29–8.28 (d, J=7.75 Hz, 1H), 8.24–8.22 (d, J=7.45 Hz, 1H), 8.22–8.20 (d, J=8.95 Hz, 1H), 8.17–8.15 (d, J=8.95 Hz, 1H), 8.09–8.06 (m, 2H), 7.94–7.92 (d, J=9.10 Hz, 1H), 7.85–7.83 (d, J=7.75 Hz, 1H), 2.71 (s, 6H), 0.89 (s, 6H). <sup>13</sup>C NMR (850 MHz, Chloroform-*d*): δ (ppm) 156.99, 145.41, 140.48, 132.07, 131.26, 130.95, 129.39, 129.20, 128.79, 128.71, 127.24, 126.68, 126.07, 125.95, 125.49, 124.70, 124.44, 123.67, 85.75, 78.03, 77.93, 77.72, 77.15, 77.00, 76.86, 76.22, 76.00, 33.38, 31.93, 30.17, 30.04, 29.71, 29.37, 26.70, 22.70, 16.41, 16.14, 14.13. GC/HRMS (EI) calculated for C<sub>29</sub>H<sub>21</sub>BF<sub>2</sub>I<sub>2</sub>N<sub>2</sub>: 699.9855, found: 699.9857.

### Synthesis of BEN-BDP-2I

A solution of benzaldehyde (320 mg, 3.015 mmol, 1 eq) and 2,4-dimethylpyrrole (1.24 mL, 12.061 mmol, 4 eq) in dry CH<sub>2</sub>Cl<sub>2</sub> (200 mL) was mixed with a solution of trifluoroacetic acid (46.17 μL, 0.603 mmol) in dry CH<sub>2</sub>Cl<sub>2</sub> (3 mL) at room temperature under N<sub>2</sub> atmosphere. After 1.5 h, dichloro-5,6-dicyano-1,4-benzoquinone (DDQ) (0.68 g, 3.015 mmol) was added while cooling on ice and stirred for 10 min. After another hour, triethylamine (6 mL) was added followed by BF<sub>3</sub>·Et<sub>2</sub>O (6 mL), and the mixture was stirred for an additional 2 h before being poured into water. After extraction, the organic layer was dried over anhydrous MgSO<sub>4</sub>, and then evaporated under reduced pressure to obtain the crude product. To purify the crude product, column chromatography was performed using silica gel and a mixture of CH<sub>2</sub>Cl<sub>2</sub>/*n*-hexane (1:1, v/v) as the eluent. This process produced an orange solid BEN-BDP, which was used as a precursor to BEN-BDP-2I.

N-Iodosuccinimide (NIS) (347 mg, 1.542 mmol, 5 eq) in CH<sub>2</sub>Cl<sub>2</sub> (30 mL) was slowly added dropwise to BEN-BDP (100 mg, 0.308 mmol) in 25 mL of dry CH<sub>2</sub>Cl<sub>2</sub> within 0.5 h. The resulting mixture was stirred for an additional 12 h, washed with a sodium chloride aqueous solution, and extracted with

CH<sub>2</sub>Cl<sub>2</sub>. The organic layers were combined, dried with MgSO<sub>4</sub>, and then evaporated until dryness. The red solid product BEN-BDP-2I was obtained with a 71% yield (125 mg) through column chromatography on silica gel, using CH<sub>2</sub>Cl<sub>2</sub>/*n*-hexane (1:1, v/v) as the eluent. <sup>1</sup>H NMR (500 MHz, Chloroform-d): δ (ppm) 7.53–7.51 (m, 3H), 7.26–7.24 (m, 2H), 2.64 (s, 6H), 1.38 (s, 6H). <sup>13</sup>C NMR (850 MHz, Chloroform-d): δ (ppm) 156.96, 145.57, 141.58, 134.92, 131.49, 129.73, 129.66, 127.97, 85.87, 85.83, 77.47, 77.22, 76.96, 31.13, 29.90, 17.13, 16.22. GC/HRMS (EI) calculated for C<sub>19</sub>H<sub>17</sub>BF<sub>2</sub>I<sub>2</sub>N<sub>2</sub>: 575.9542, found: 575.9541.

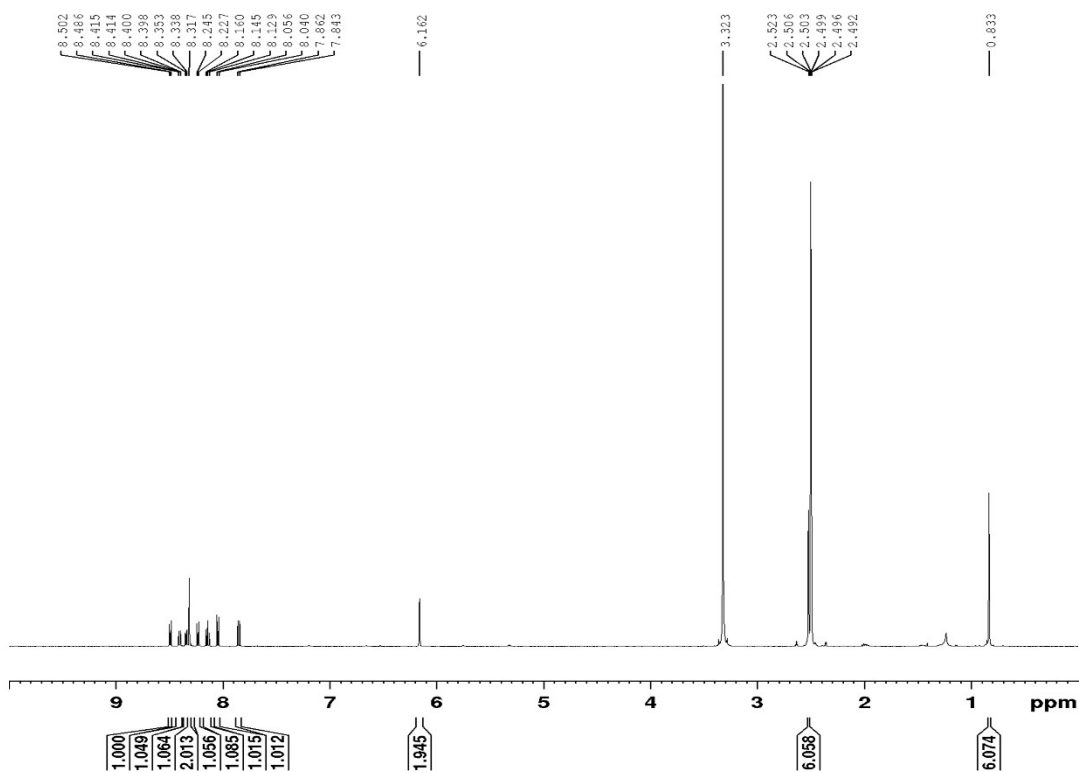

Fig. S1. <sup>1</sup>H NMR of PY-BDP.

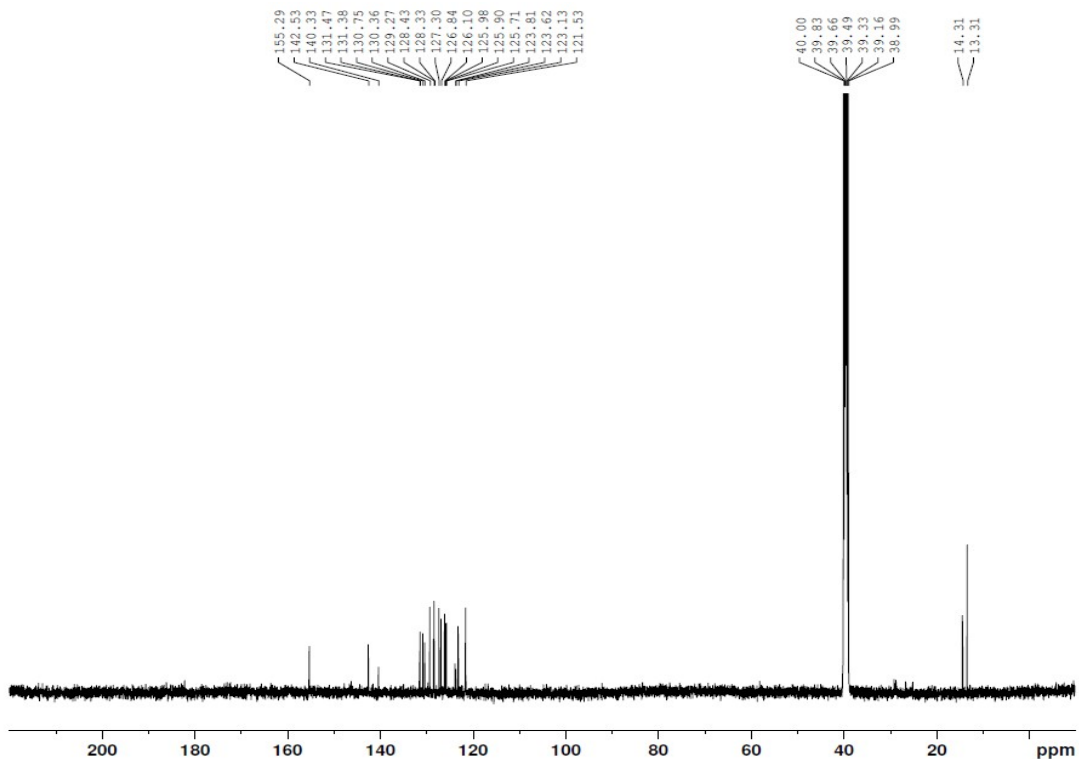

**Fig. S2.**  $^{13}\text{C}$  NMR of PY-BDP.

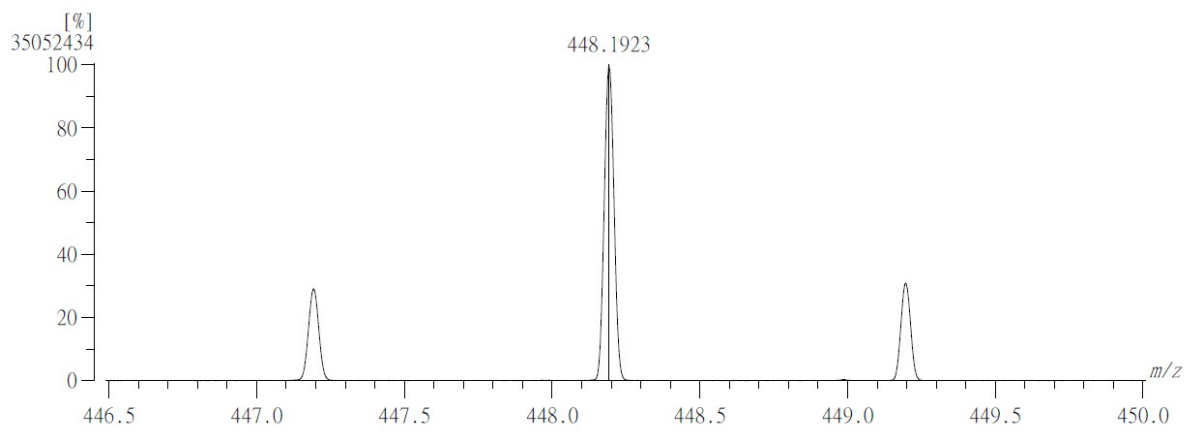

**Fig. S3.** GC/HRMS data of PY-BDP.

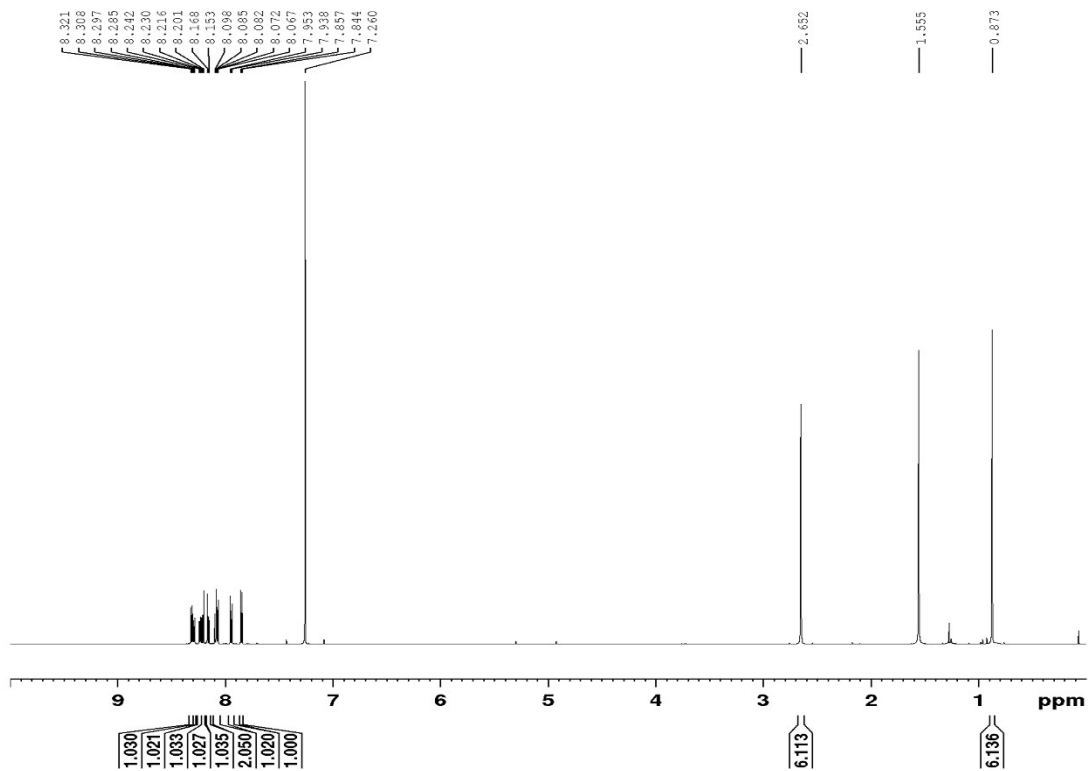

Fig. S4.  $^1\text{H}$  NMR of PY-BDP-2Cl.

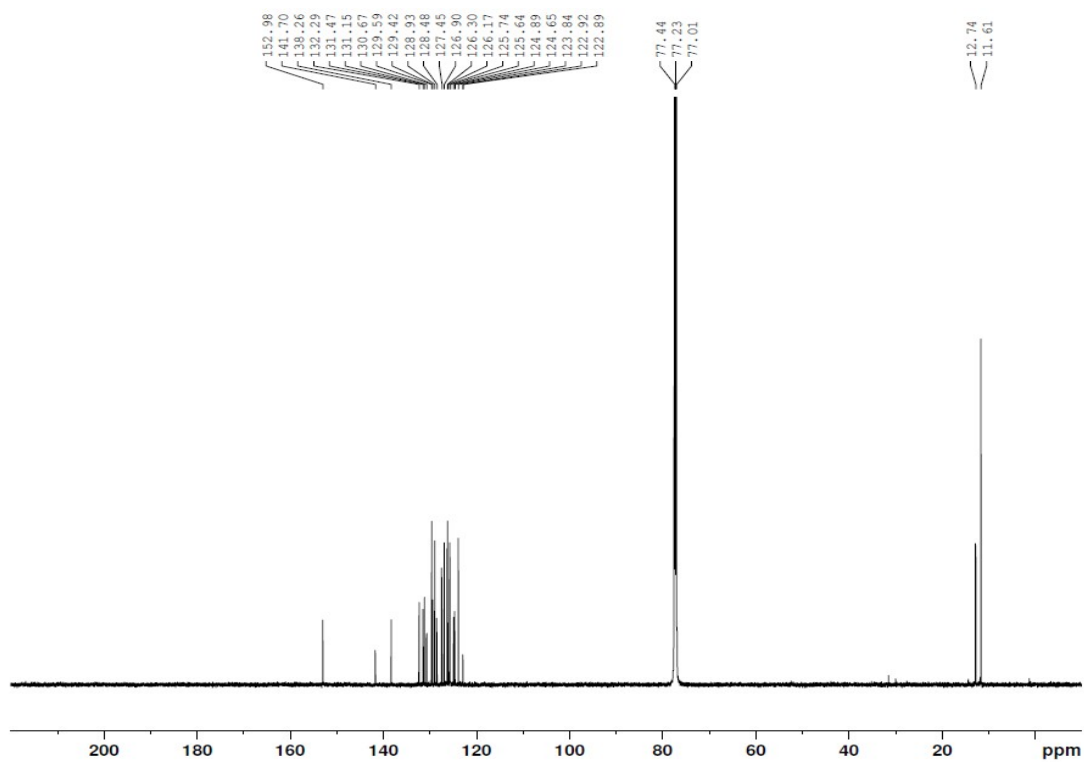

Fig. S5.  $^{13}\text{C}$  NMR of PY-BDP-2Cl.



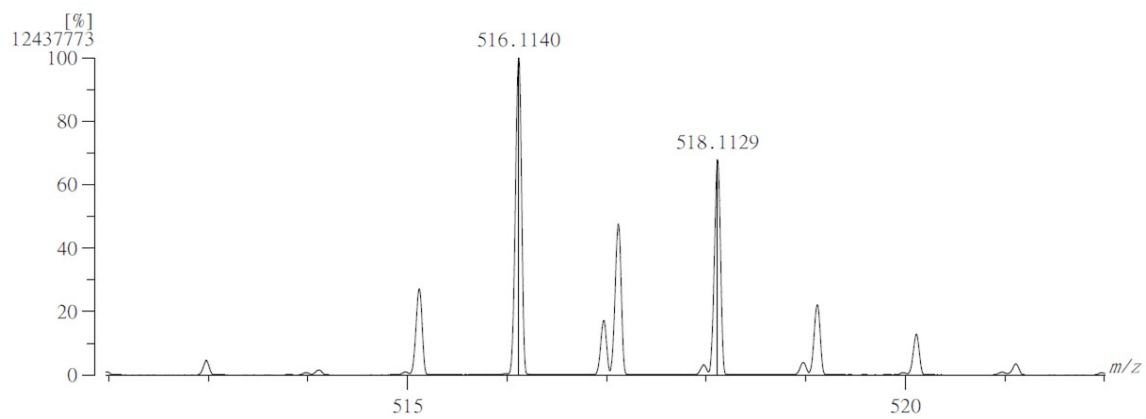

**Fig. S6.** GC/HRMS data of PY-BDP-2Cl.

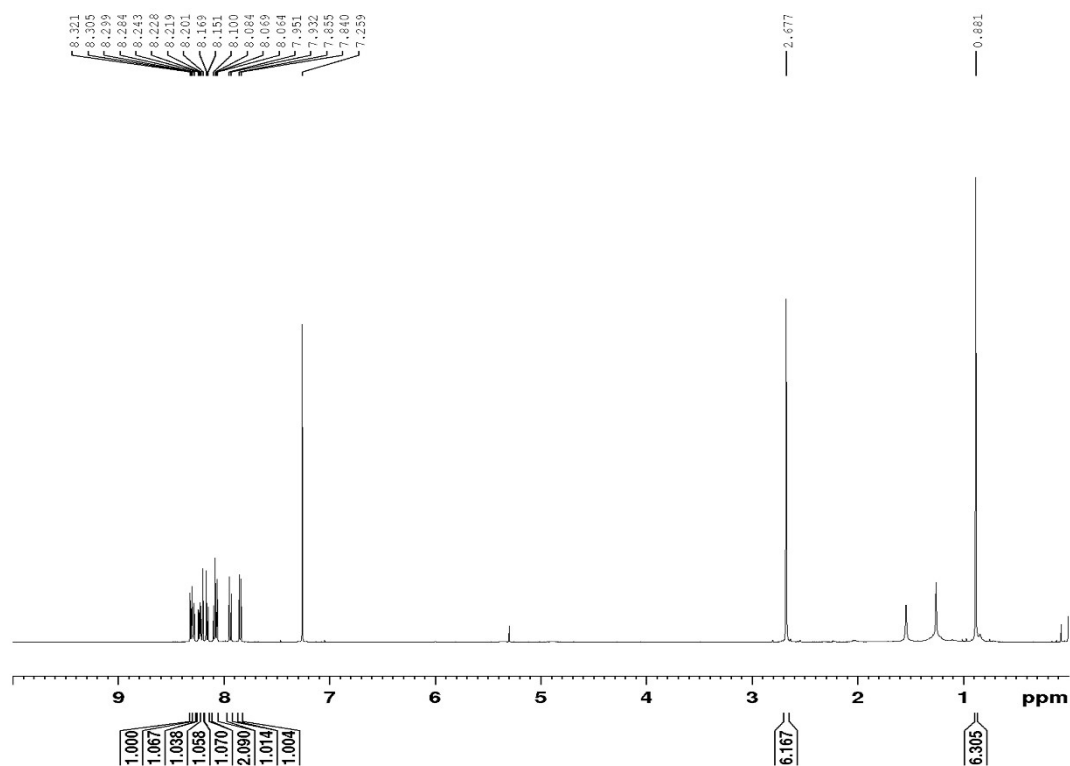

**Fig. S7.**  $^1\text{H}$  NMR of PY-BDP-2Br.

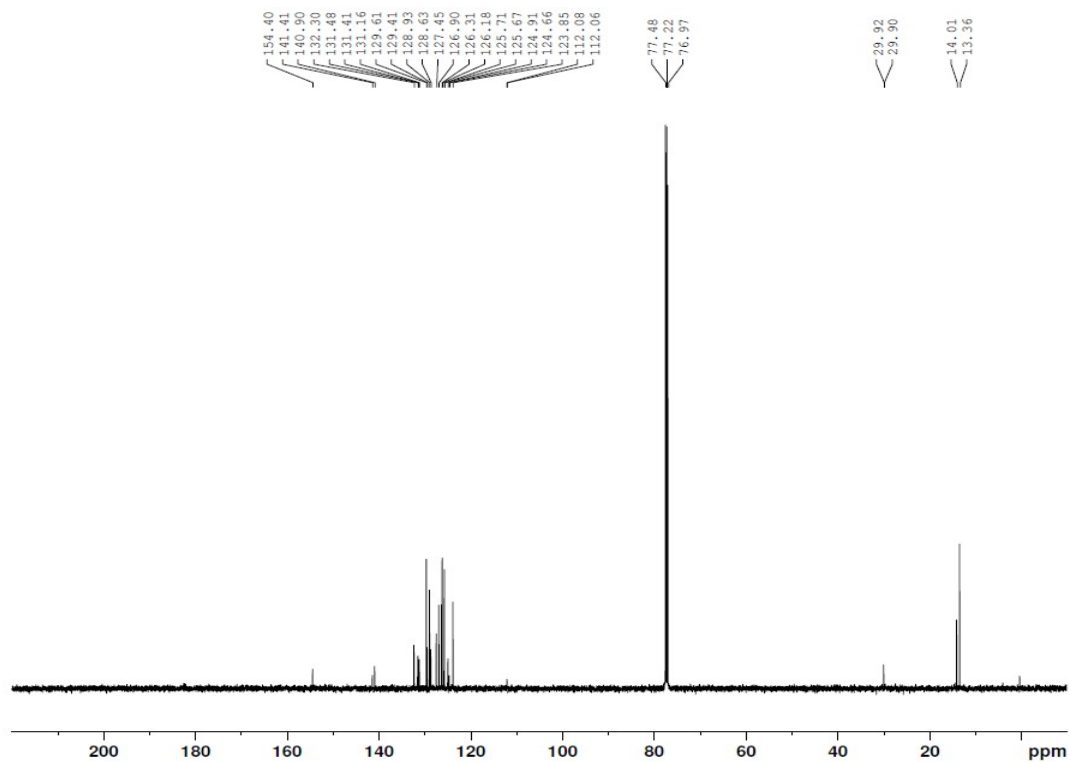

**Fig. S8.**  $^{13}\text{C}$  NMR of PY-BDP-2Br.

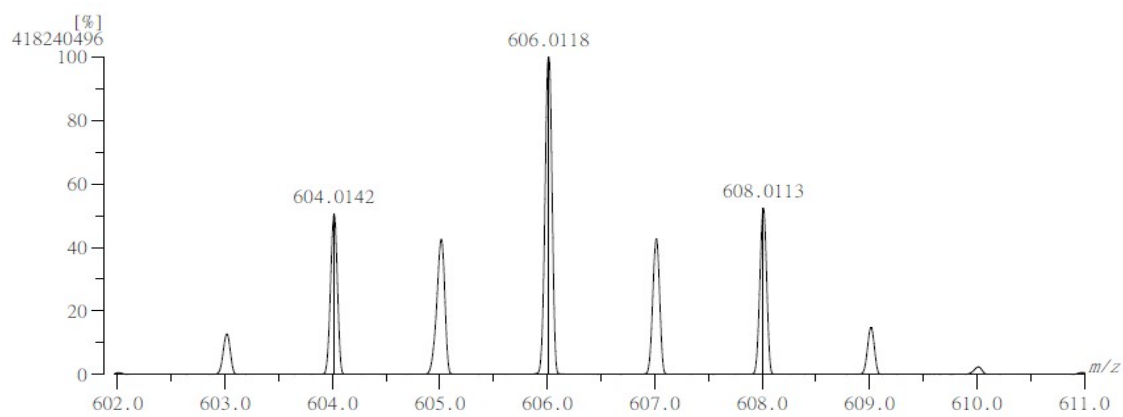

**Fig. S9.** GC/HRMS data of PY-BDP-2Br.

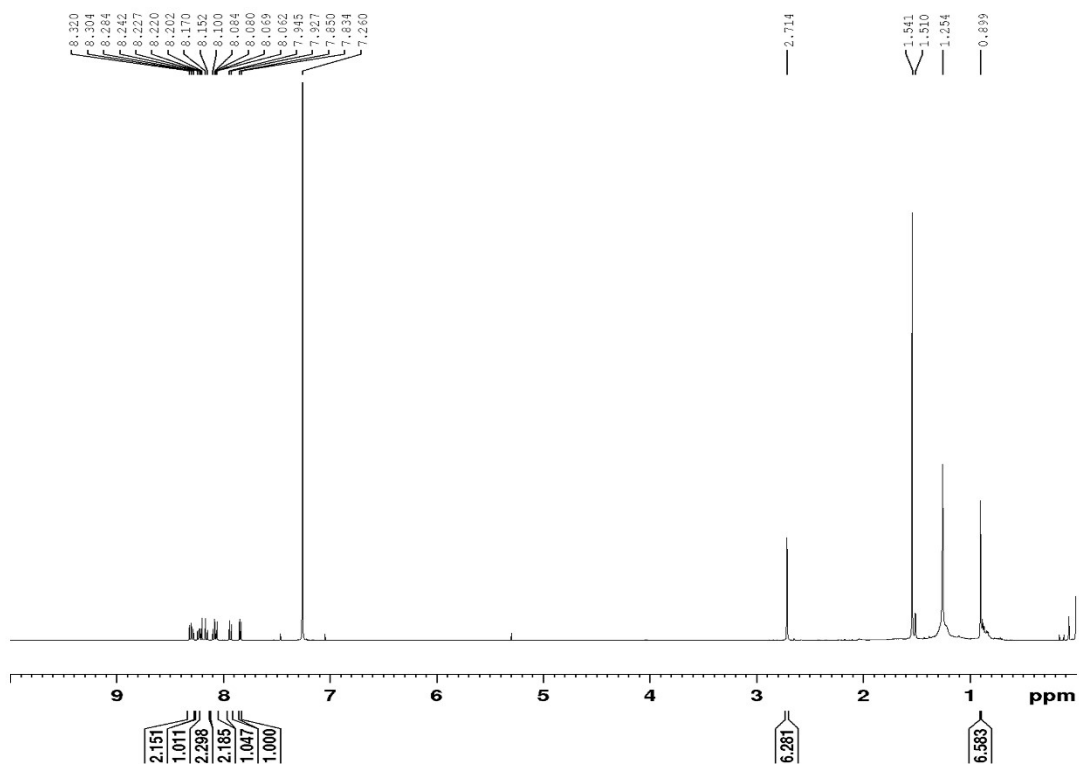

Fig. S10.  $^1\text{H}$  NMR of PY-BDP-2I.

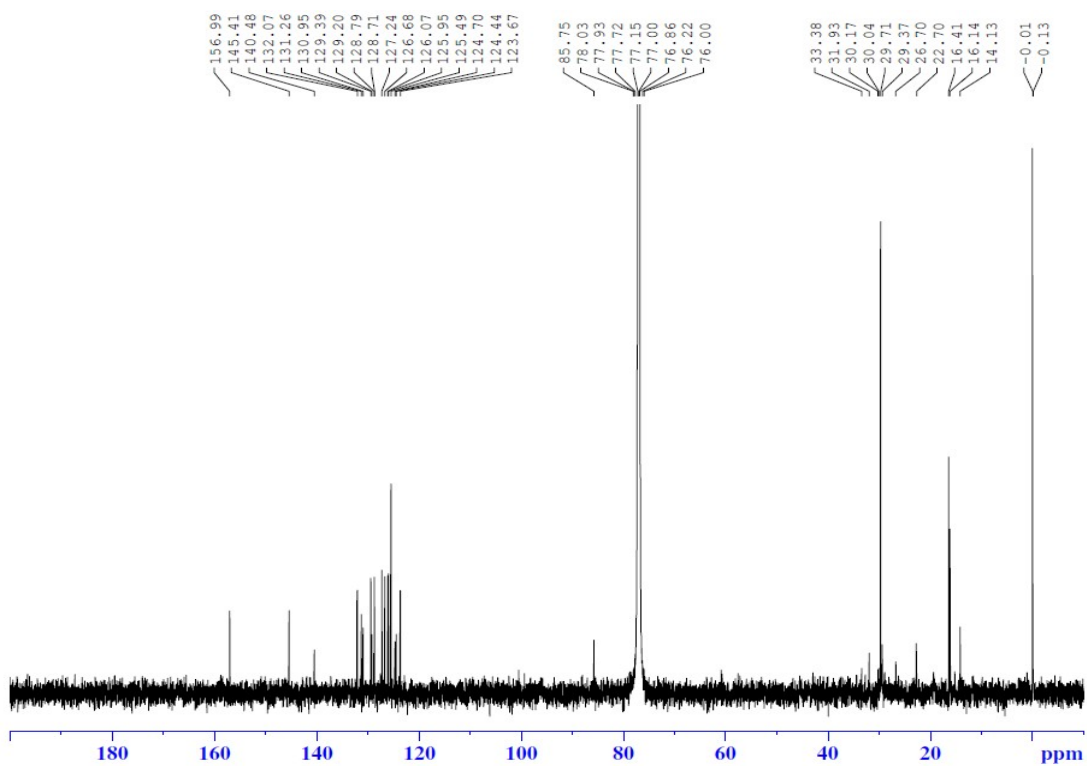

Fig. S11.  $^{13}\text{C}$  NMR of PY-BDP-2I.

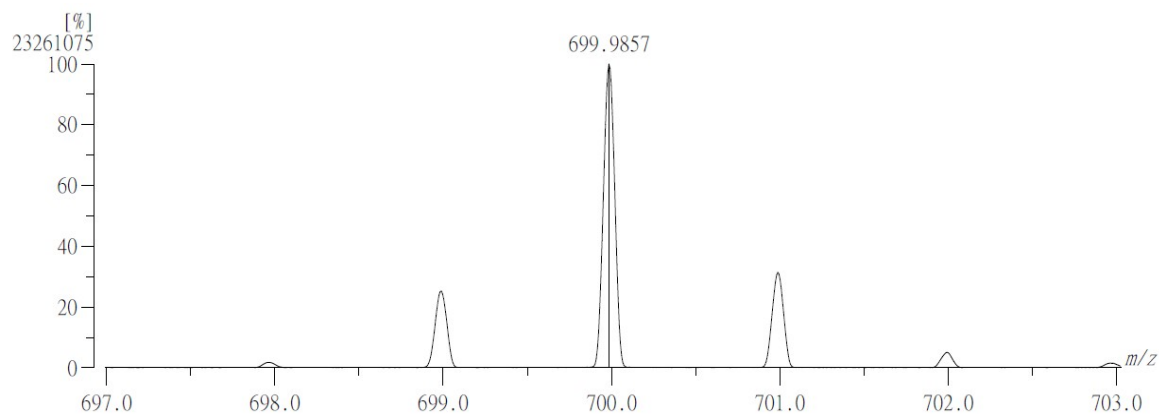

**Fig. S12.** GC/HRMS data of PY-BDP-2I.

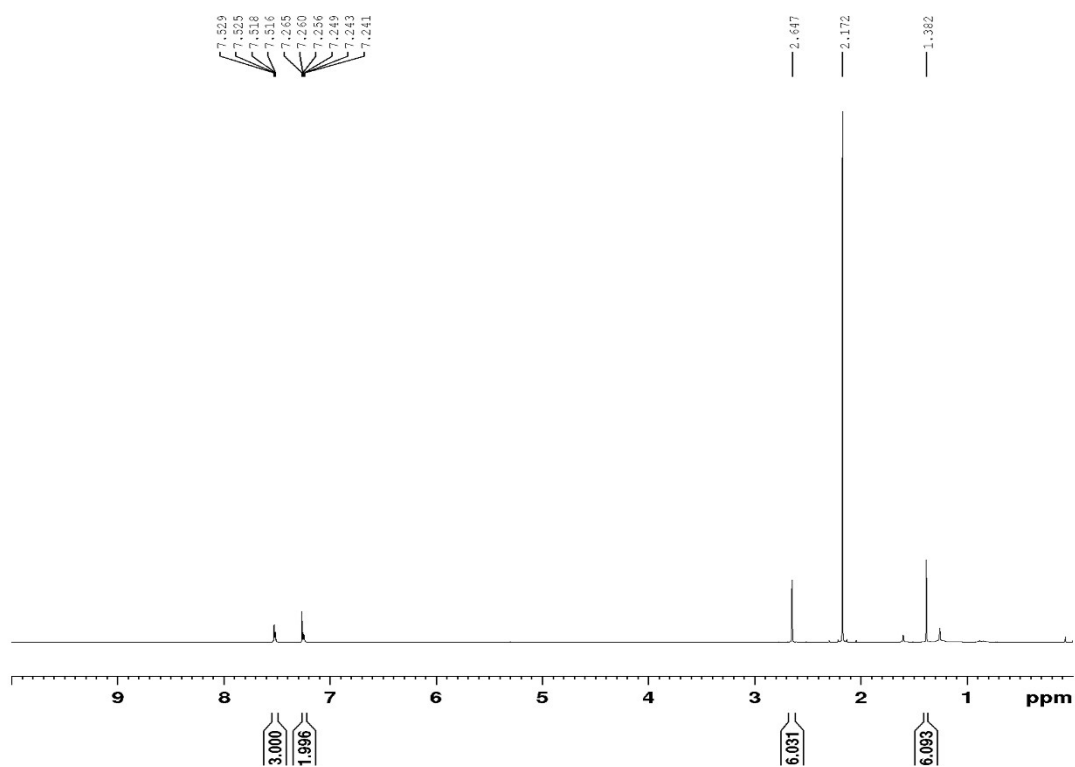

**Fig. S13.** <sup>1</sup>H NMR of BEN-BDP-2I.

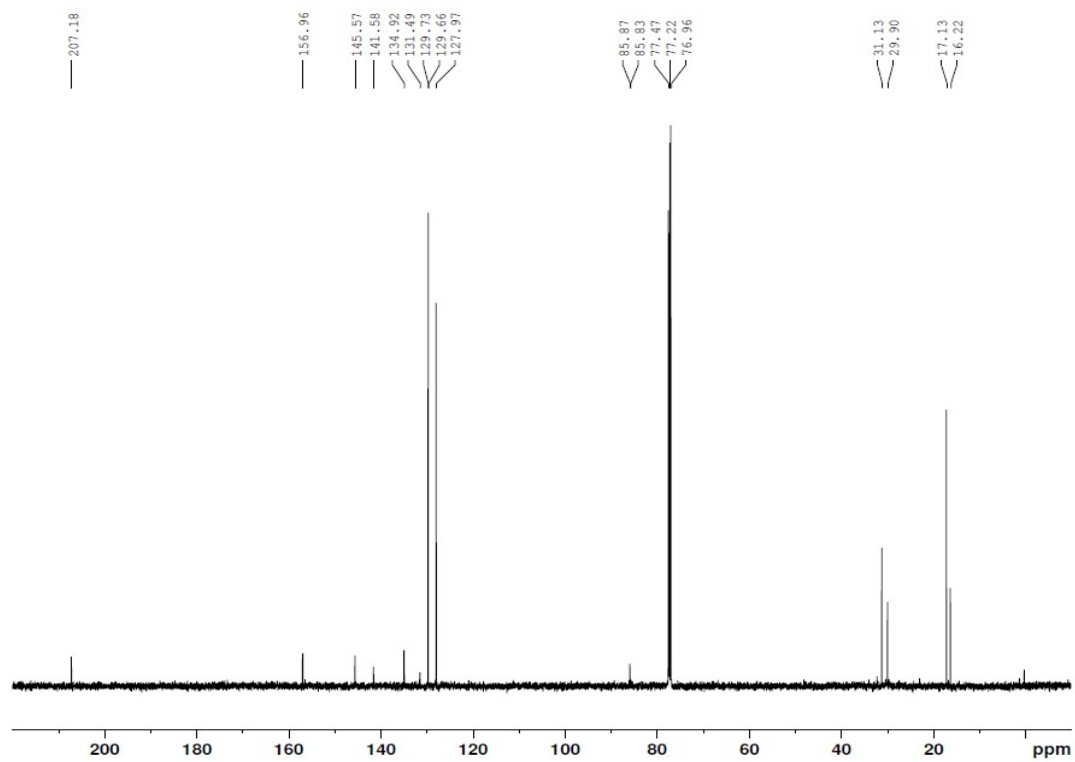

**Fig. S14.**  $^{13}\text{C}$  NMR of BEN-BDP-2I.

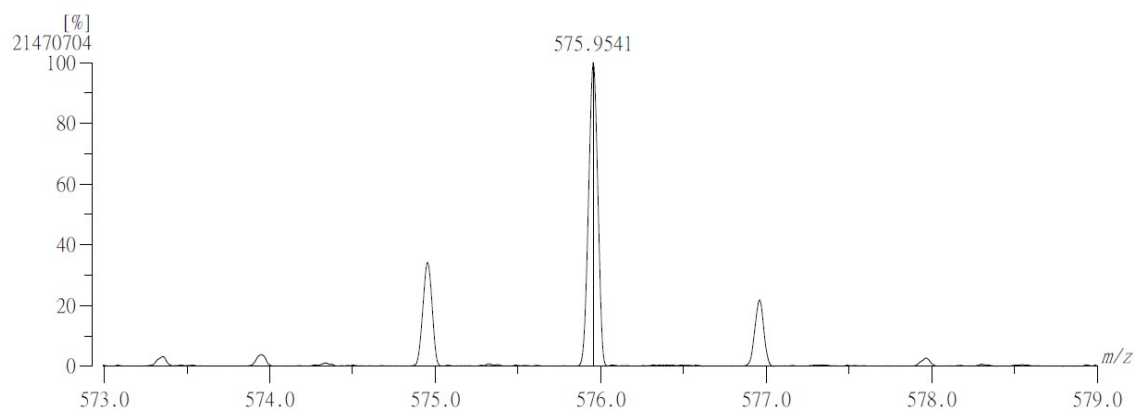

**Fig. S15.** GC/HRMS data of BEN-BDP-2I.

## 2. UV-vis absorption spectra

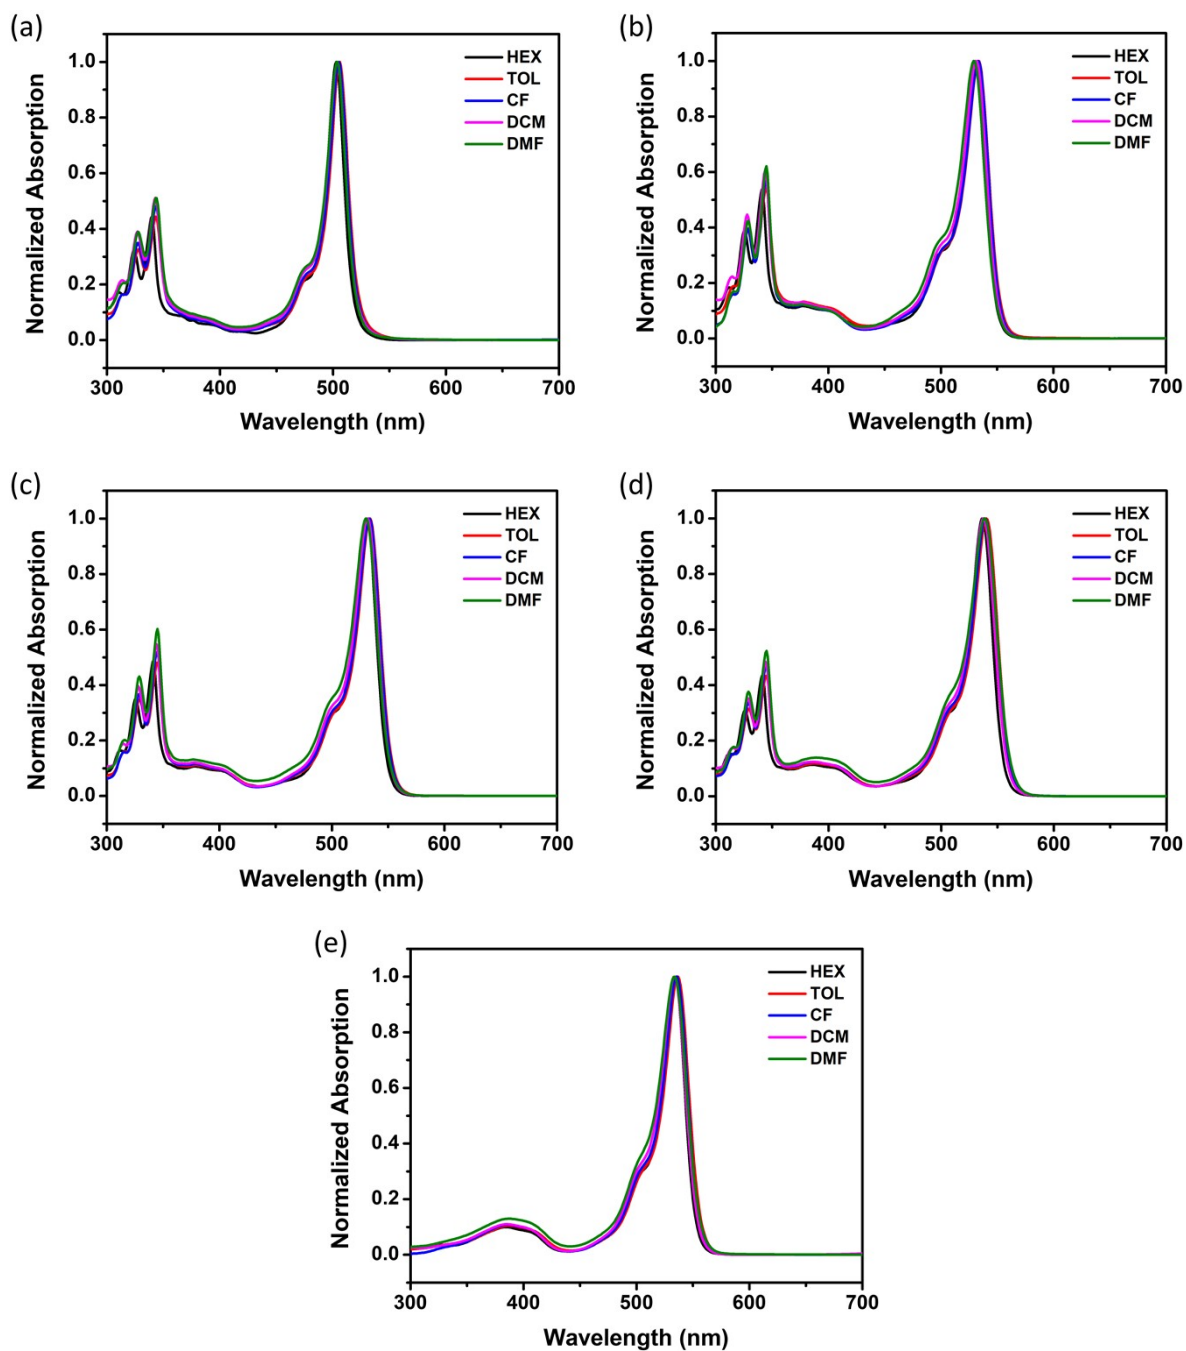

**Fig. S16.** Normalized UV-vis absorption spectra of (a) PY-BDP, (b) PY-BDP-2Cl, (c) PY-BDP-2Br, (d) PY-BDP-2I, and (e) BEN-BDP-2I in *n*-hexane (HEX), toluene (TOL), chloroform (CF), dichloromethane (DCM), and *N,N*-dimethylformamide (DMF).

### 3. Fluorescence emission spectra

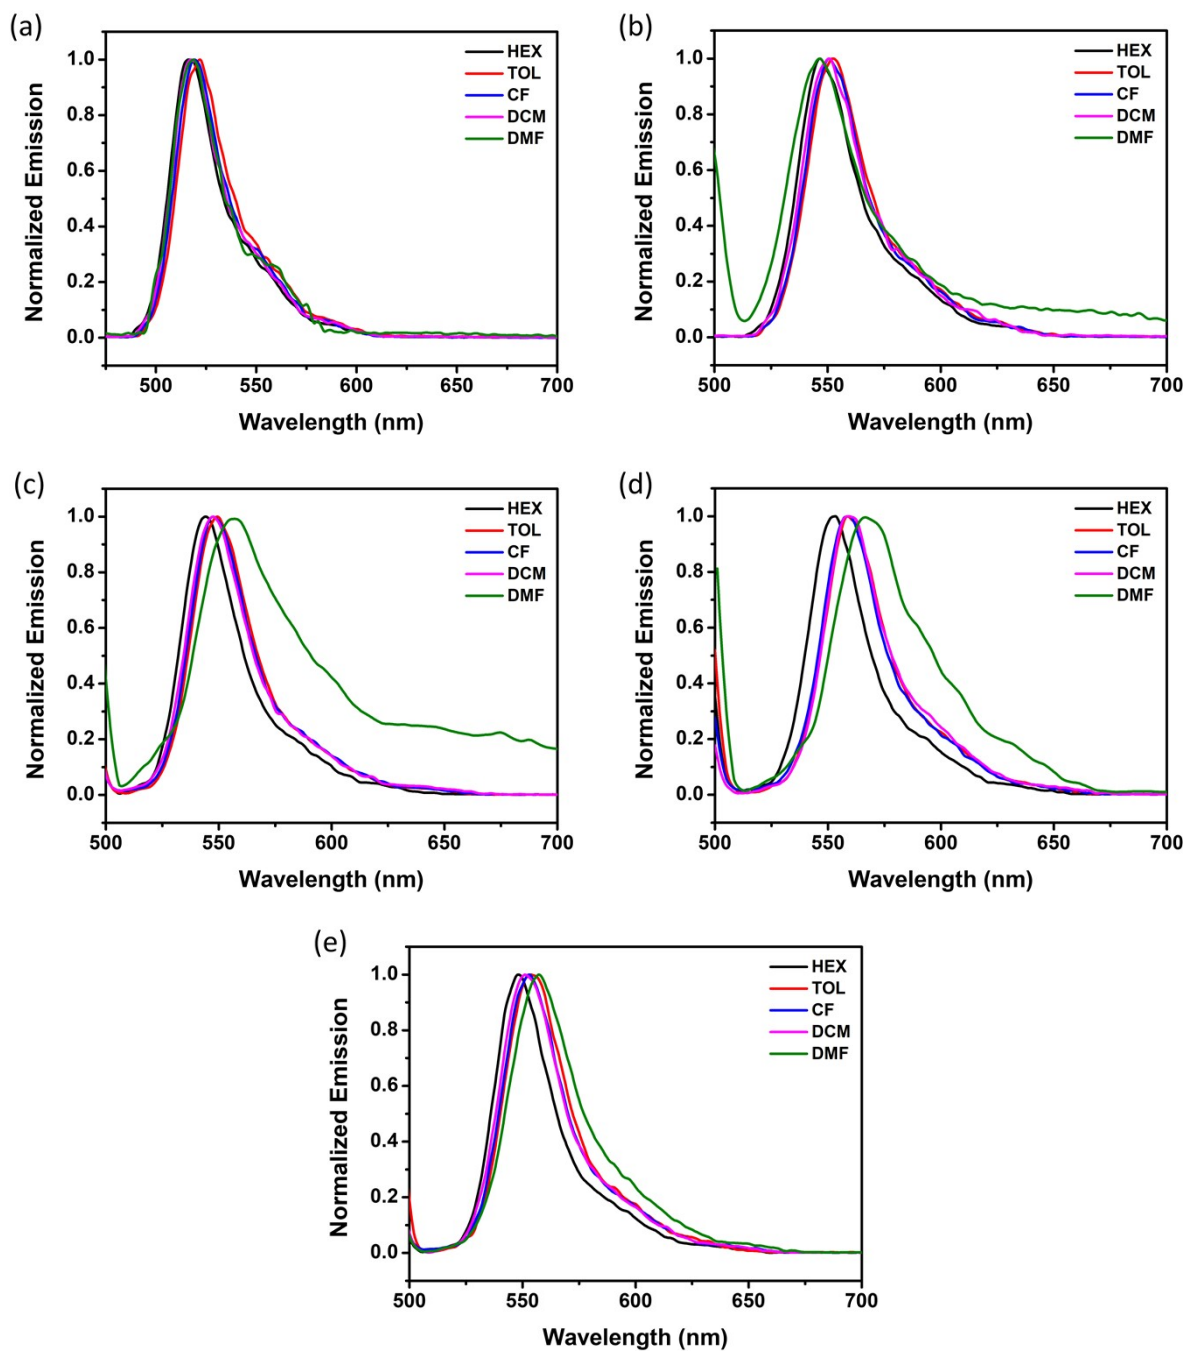

**Fig. S17.** Normalized fluorescence emission spectra of (a) PY-BDP, (b) PY-BDP-2Cl, (c) PY-BDP-2Br, (d) PY-BDP-2I, and (e) BEN-BDP-2I in different solvents.

**Table S1.** Absorption and fluorescence emission maximum wavelength, molar absorption coefficient, stokes shift, and fluorescence quantum yield of photosensitizers in different solvents

| Compound   | Solvent | $\lambda_{abs}$<br>(nm) | $\epsilon_{max}$<br>(M <sup>-1</sup> cm <sup>-1</sup> ) | $\lambda_{emi}$<br>(nm) | $\Delta f$<br>(nm) | $\Phi_F$ |
|------------|---------|-------------------------|---------------------------------------------------------|-------------------------|--------------------|----------|
| PY-BDP     | HEX     | 503                     | 40,100                                                  | 516                     | 13                 | 0.890    |
|            | TOL     | 506                     | 42,610                                                  | 522                     | 16                 | 0.766    |
|            | CF      | 505                     | 39,640                                                  | 519                     | 14                 | 0.755    |
|            | DCM     | 504                     | 38,970                                                  | 517                     | 13                 | 0.630    |
|            | DMF     | 504                     | 38,120                                                  | 518                     | 14                 | 0.212    |
| PY-BDP-2Cl | HEX     | 531                     | 33,340                                                  | 546                     | 15                 | 0.741    |
|            | TOL     | 533                     | 32,980                                                  | 552                     | 19                 | 0.723    |
|            | CF      | 533                     | 31,700                                                  | 550                     | 17                 | 0.710    |
|            | DCM     | 531                     | 32,060                                                  | 551                     | 20                 | 0.359    |
|            | DMF     | 529                     | 28,230                                                  | 546                     | 17                 | 0.100    |
| PY-BDP-2Br | HEX     | 531                     | 74,640                                                  | 544                     | 13                 | 0.124    |
|            | TOL     | 534                     | 72,970                                                  | 549                     | 15                 | 0.109    |
|            | CF      | 533                     | 70,760                                                  | 547                     | 14                 | 0.106    |
|            | DCM     | 532                     | 71,650                                                  | 547                     | 15                 | 0.057    |
|            | DMF     | 530                     | 62,260                                                  | 559                     | 29                 | 0.014    |
| PY-BDP-2I  | HEX     | 537                     | 92,160                                                  | 553                     | 16                 | 0.023    |
|            | TOL     | 540                     | 85,610                                                  | 558                     | 18                 | 0.020    |
|            | CF      | 539                     | 84,430                                                  | 559                     | 20                 | 0.016    |
|            | DCM     | 538                     | 87,870                                                  | 559                     | 21                 | 0.014    |
|            | DMF     | 539                     | 74,060                                                  | 565                     | 26                 | 0.007    |
| BEN-BDP-2I | HEX     | 534                     | 111,920                                                 | 548                     | 14                 | 0.049    |
|            | TOL     | 536                     | 106,900                                                 | 553                     | 17                 | 0.043    |
|            | CF      | 535                     | 103,680                                                 | 553                     | 18                 | 0.032    |
|            | DCM     | 534                     | 105,520                                                 | 551                     | 17                 | 0.027    |
|            | DMF     | 534                     | 91,850                                                  | 557                     | 23                 | 0.016    |

#### 4. Singlet oxygen quantum yield (SOQY) measurement



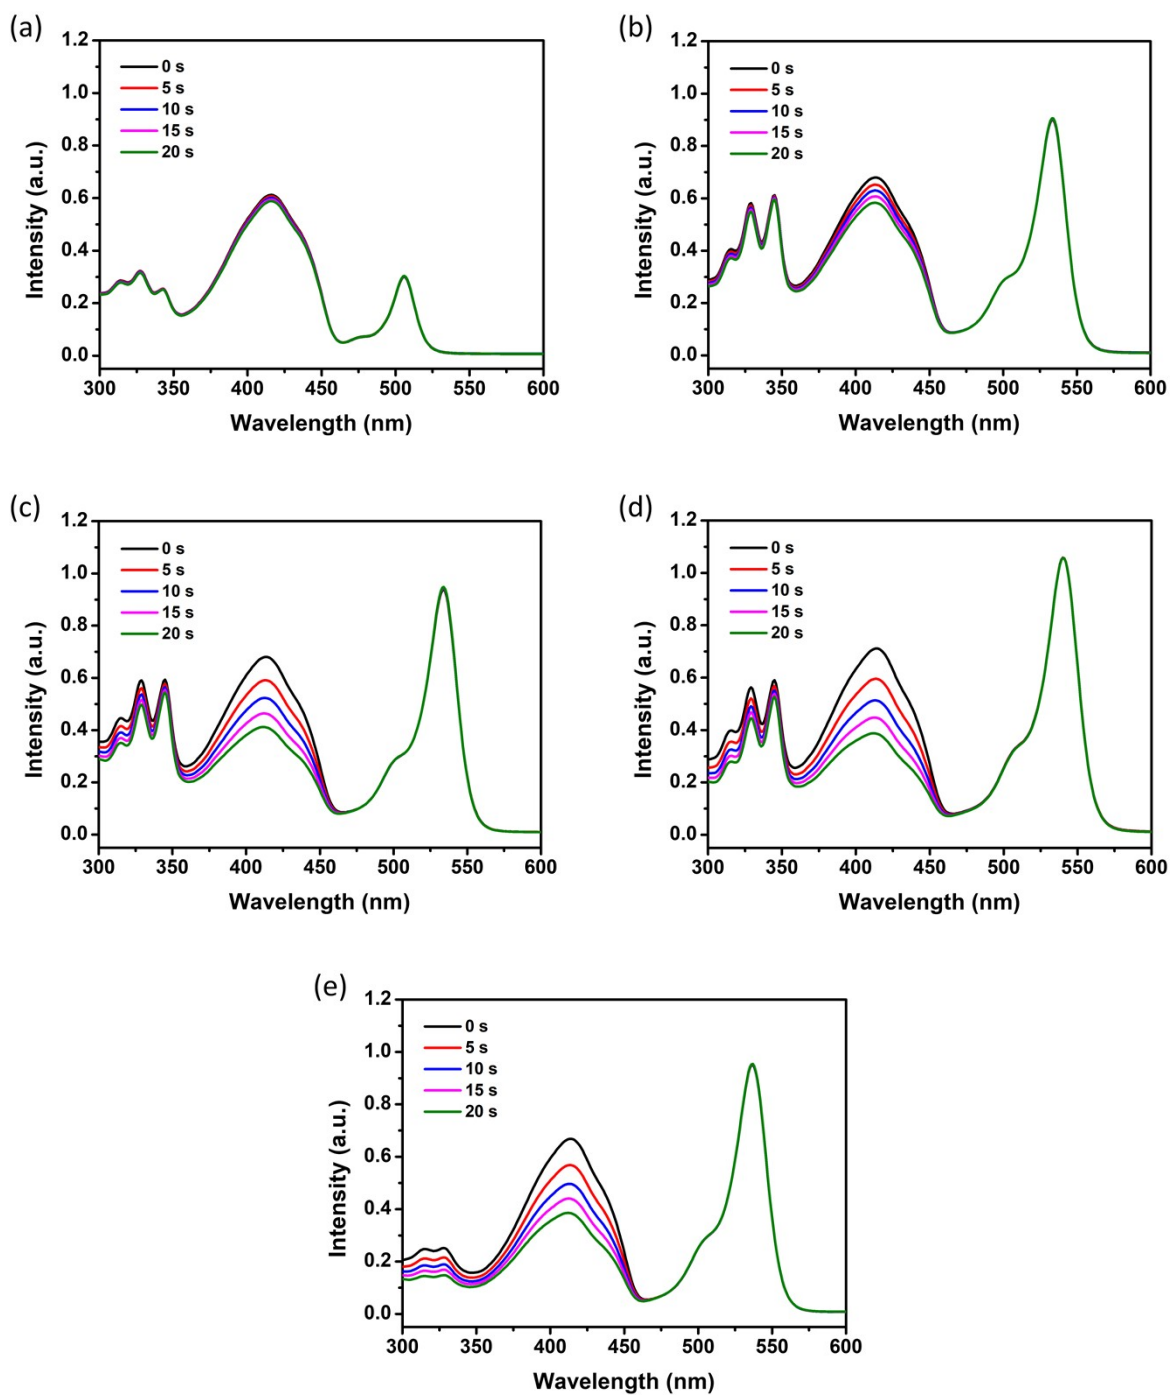

**Fig. S18.** The singlet oxygen quantum yield of (a) PY-BDP, (b) PY-BDP-2Cl, (c) PY-BDP-2Br, (d) PY-BDP-2I, and (e) BEN-BDP-2I was evaluated in toluene with an absorbance of 0.3 at 505 nm.

## 5. Electrochemical characterization

**Table S2.** Oxidation ( $E_{OX}$ ) and reduction ( $E_{RED}$ ) potentials of the reference compounds <sup>a</sup>

| Compound | $E_{OX}$ (V) <sup>c</sup> | $E_{RED}$ (V) <sup>c</sup> |
|----------|---------------------------|----------------------------|
| Pyrene   | 1.19                      | – <sup>b</sup>             |
| BDP      | – <sup>b</sup>            | –0.99                      |
| BDP-2Cl  | – <sup>b</sup>            | –0.98                      |
| BDP-2Br  | – <sup>b</sup>            | –1.00                      |
| BDP-2I   | – <sup>b</sup>            | –1.01                      |

<sup>a</sup> Cyclic voltammograms of the reference compounds in dichloromethane containing 0.10 M Bu<sub>4</sub>NPF<sub>6</sub> as the supporting electrolyte and Ag/AgCl as the reference electrode. <sup>b</sup> Not observed. <sup>c</sup> Ferrocene (Fc) was used as the external reference ( $E_{1/2} = +0.38$  V, Fc<sup>+</sup> / Fc). Scan rates: 100 mV/s.  $c = 1.0 \times 10^{-3}$  M, T = 25 °C.

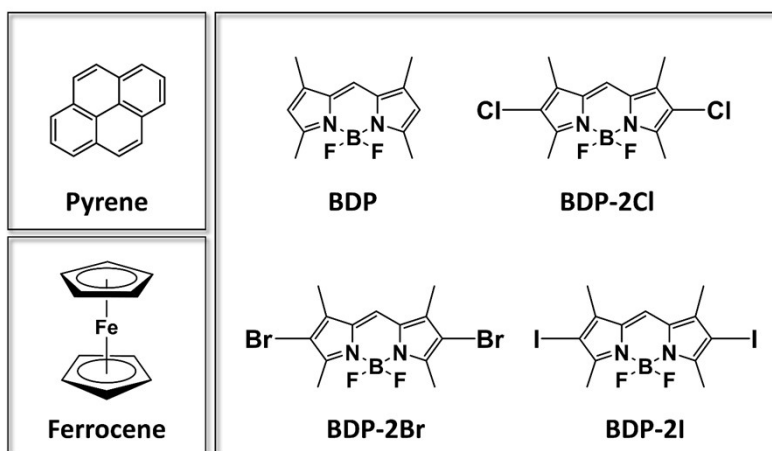

**Fig. S19.** Molecular design of the pyrene moiety (Pyrene) and the BODIPY moiety (BDP, BDP-2Cl, BDP-2Br, and BDP-2I).

## 6. fs-to- $\mu$ s Transient absorption spectroscopy

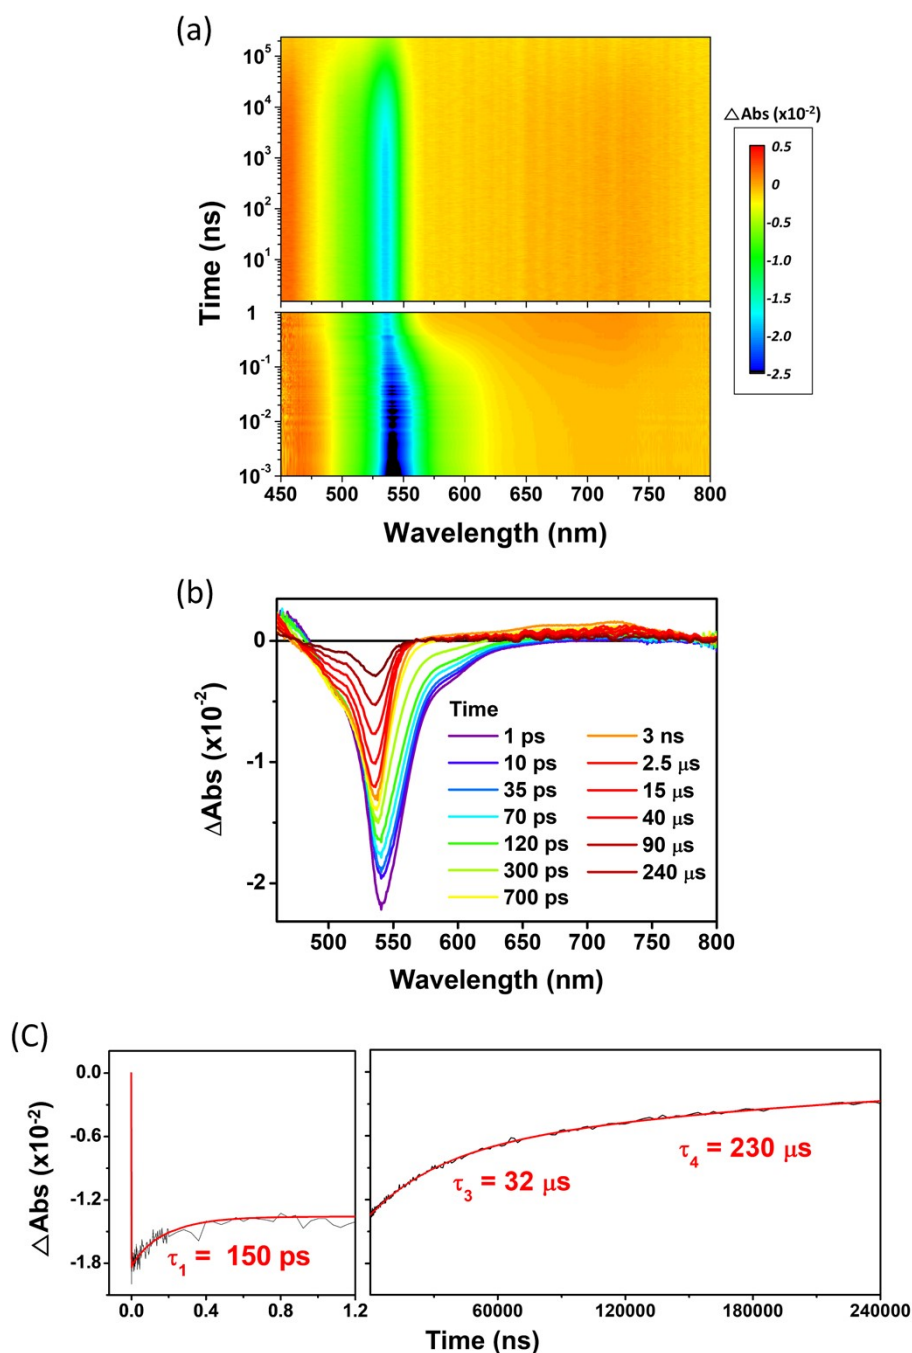

**Fig. S20.** fs-to- $\mu\text{s}$  TA (a) 2D map, (b) spectra, and (c) decay profile of BEN-BDP-2I in toluene with photoexcitation at 500 nm. TA decay profile was plotted at 540 nm. Because our measured time window, 240  $\mu\text{s}$ , is not enough to measure the longest decay time constant, we estimated the other time constants with the last infinite time constant.

## 7. Density functional theory (DFT) calculation

1) Optimized geometry of PY-BDP

|    |   |          |          |          |
|----|---|----------|----------|----------|
| 1  | C | -1.73043 | 1.22246  | -0.28565 |
| 2  | N | -3.07772 | 1.24424  | 0.09943  |
| 3  | B | -3.97232 | 0.00089  | 0.35697  |
| 4  | N | -3.07859 | -1.24345 | 0.10118  |
| 5  | C | -1.73129 | -1.22311 | -0.28393 |
| 6  | C | -1.06562 | -0.00067 | -0.47718 |
| 7  | C | -1.28901 | 2.58237  | -0.41124 |
| 8  | C | -2.38966 | 3.37283  | -0.09782 |
| 9  | C | -3.47427 | 2.52851  | 0.21169  |
| 10 | C | -3.47592 | -2.52731 | 0.21550  |
| 11 | C | -2.39181 | -3.37278 | -0.09261 |
| 12 | C | -1.29067 | -2.58348 | -0.40726 |
| 13 | C | 0.36298  | -0.00144 | -0.92249 |
| 14 | C | 1.42492  | -0.00028 | 0.01055  |
| 15 | C | 2.77220  | -0.00085 | -0.47162 |
| 16 | C | 3.03404  | -0.00255 | -1.87601 |
| 17 | C | 1.94969  | -0.00367 | -2.76710 |
| 18 | C | 0.64100  | -0.00313 | -2.29476 |
| 19 | C | 0.06113  | 3.11537  | -0.78777 |
| 20 | C | 0.05920  | -3.11789 | -0.78281 |
| 21 | C | -4.86377 | -2.91063 | 0.61100  |
| 22 | C | -4.86175 | 2.91325  | 0.60711  |
| 23 | F | -5.06121 | 0.00065  | -0.51996 |
| 24 | F | -4.42762 | 0.00204  | 1.67913  |
| 25 | C | 1.20775  | 0.00146  | 1.43396  |
| 26 | C | 2.25018  | 0.00253  | 2.31029  |
| 27 | C | 3.61313  | 0.00200  | 1.85689  |
| 28 | C | 3.86266  | 0.00030  | 0.45096  |
| 29 | C | 5.20856  | -0.00025 | -0.02936 |
| 30 | C | 5.43565  | -0.00196 | -1.44877 |
| 31 | C | 4.39799  | -0.00305 | -2.32981 |
| 32 | C | 4.70060  | 0.00310  | 2.74565  |
| 33 | C | 6.01006  | 0.00255  | 2.26803  |
| 34 | C | 6.26401  | 0.00090  | 0.89733  |
| 35 | H | -2.42024 | 4.45417  | -0.08868 |
| 36 | H | -2.42300 | -4.45408 | -0.08160 |
| 37 | H | 2.13911  | -0.00495 | -3.83671 |
| 38 | H | -0.18561 | -0.00398 | -2.99881 |
| 39 | H | 0.03596  | 4.20813  | -0.79695 |
| 40 | H | 0.83580  | 2.80160  | -0.08124 |
| 41 | H | 0.37847  | 2.77405  | -1.77748 |
| 42 | H | 0.37565  | -2.78046 | -1.77415 |
| 43 | H | 0.83448  | -2.80131 | -0.07822 |
| 44 | H | 0.03404  | -4.21068 | -0.78770 |
| 45 | H | -4.96613 | -3.99674 | 0.64212  |
| 46 | H | -5.11095 | -2.49716 | 1.59357  |
| 47 | H | -5.59156 | -2.50027 | -0.09571 |
| 48 | H | -5.59023 | 2.49816  | -0.09606 |
| 49 | H | -5.10722 | 2.50523  | 1.59243  |

|    |   |          |          |          |
|----|---|----------|----------|----------|
| 50 | H | -4.96479 | 3.99944  | 0.63232  |
| 51 | H | 0.18839  | 0.00190  | 1.80463  |
| 52 | H | 2.06216  | 0.00383  | 3.38044  |
| 53 | H | 6.46136  | -0.00237 | -1.80719 |
| 54 | H | 4.58413  | -0.00434 | -3.40022 |
| 55 | H | 4.50963  | 0.00439  | 3.81515  |
| 56 | H | 6.83911  | 0.00342  | 2.96922  |
| 57 | H | 7.28743  | 0.00049  | 0.53255  |

## 2) Optimized geometry of PY-BDP-2Cl

|    |   |          |          |          |
|----|---|----------|----------|----------|
| 1  | C | 1.27930  | -1.22173 | -0.15088 |
| 2  | N | 2.67714  | -1.24529 | -0.09052 |
| 3  | B | 3.60400  | 0.00032  | -0.04734 |
| 4  | N | 2.67665  | 1.24567  | -0.08913 |
| 5  | C | 1.27885  | 1.22152  | -0.15078 |
| 6  | C | 0.58889  | -0.00023 | -0.18341 |
| 7  | C | 0.81019  | -2.57483 | -0.17190 |
| 8  | C | 1.96189  | -3.35119 | -0.12441 |
| 9  | C | 3.10148  | -2.52133 | -0.07501 |
| 10 | C | 3.10046  | 2.52188  | -0.07453 |
| 11 | C | 1.96058  | 3.35126  | -0.12577 |
| 12 | C | 0.80924  | 2.57443  | -0.17333 |
| 13 | C | -0.90416 | -0.00054 | -0.27045 |
| 14 | C | -1.70327 | 0.00075  | 0.93745  |
| 15 | C | -3.12605 | 0.00059  | 0.81006  |
| 16 | C | -3.73686 | -0.00084 | -0.47752 |
| 17 | C | -2.92571 | -0.00219 | -1.64850 |
| 18 | C | -1.50029 | -0.00202 | -1.49519 |
| 19 | C | -5.15802 | -0.00097 | -0.60015 |
| 20 | C | -5.72922 | -0.00242 | -1.88125 |
| 21 | C | -4.92803 | -0.00374 | -3.01940 |
| 22 | C | -3.54079 | -0.00362 | -2.90924 |
| 23 | C | -3.94381 | 0.00186  | 1.98027  |
| 24 | C | -5.37229 | 0.00172  | 1.82530  |
| 25 | C | -5.95178 | 0.00038  | 0.59670  |
| 26 | C | -1.13804 | 0.00203  | 2.22210  |
| 27 | C | -1.94577 | 0.00324  | 3.35594  |
| 28 | C | -3.33125 | 0.00319  | 3.24147  |
| 29 | C | -0.58856 | -3.10072 | -0.22892 |
| 30 | C | -0.58968 | 3.09971  | -0.23174 |
| 31 | C | 4.53565  | 2.91272  | -0.01999 |
| 32 | C | 4.53682  | -2.91118 | -0.01769 |
| 33 | F | 4.35686  | -0.00092 | 1.13544  |
| 34 | H | -0.88793 | -0.00302 | -2.39080 |
| 35 | H | -6.80951 | -0.00253 | -1.97760 |
| 36 | H | -5.38872 | -0.00486 | -4.00056 |
| 37 | H | -2.92329 | -0.00465 | -3.80077 |
| 38 | H | -5.98504 | 0.00270  | 2.72034  |

|    |    |          |          |          |
|----|----|----------|----------|----------|
| 39 | H  | -7.03207 | 0.00028  | 0.49918  |
| 40 | H  | -0.06084 | 0.00207  | 2.33390  |
| 41 | H  | -1.48665 | 0.00423  | 4.33778  |
| 42 | H  | -3.95147 | 0.00416  | 4.13115  |
| 43 | H  | -0.57933 | -4.18708 | -0.14087 |
| 44 | H  | -1.20481 | -2.69849 | 0.57714  |
| 45 | H  | -1.07744 | -2.84069 | -1.17061 |
| 46 | H  | -1.07879 | 2.83629  | -1.17235 |
| 47 | H  | -1.20553 | 2.70002  | 0.57591  |
| 48 | H  | -0.58077 | 4.18636  | -0.14734 |
| 49 | H  | 4.63445  | 3.99421  | 0.05441  |
| 50 | H  | 5.02403  | 2.44394  | 0.83685  |
| 51 | H  | 5.05761  | 2.56670  | -0.91582 |
| 52 | H  | 5.07030  | -2.52373 | -0.88906 |
| 53 | H  | 5.01180  | -2.48006 | 0.86646  |
| 54 | H  | 4.63762  | -3.99462 | 0.01145  |
| 55 | F  | 4.46328  | 0.00171  | -1.15387 |
| 56 | Cl | 2.02380  | 5.09180  | -0.12856 |
| 57 | Cl | 2.02561  | -5.09173 | -0.12521 |

### 3) Optimized geometry of PY-BDP-2Br

|    |   |          |          |          |
|----|---|----------|----------|----------|
| 1  | C | 1.03678  | -1.22180 | -0.13141 |
| 2  | N | 2.43424  | -1.24508 | -0.06672 |
| 3  | B | 3.36061  | 0.00100  | -0.02096 |
| 4  | N | 2.43333  | 1.24648  | -0.06517 |
| 5  | C | 1.03591  | 1.22218  | -0.13090 |
| 6  | C | 0.34606  | -0.00005 | -0.16597 |
| 7  | C | 0.56823  | -2.57563 | -0.15428 |
| 8  | C | 1.72035  | -3.35358 | -0.10362 |
| 9  | C | 2.85928  | -2.52110 | -0.05046 |
| 10 | C | 2.85742  | 2.52283  | -0.04924 |
| 11 | C | 1.71792  | 3.35446  | -0.10360 |
| 12 | C | 0.56640  | 2.57568  | -0.15455 |
| 13 | C | -1.14666 | -0.00059 | -0.25848 |
| 14 | C | -1.95034 | -0.00001 | 0.94643  |
| 15 | C | -3.37261 | -0.00047 | 0.81373  |
| 16 | C | -3.97860 | -0.00149 | -0.47613 |
| 17 | C | -3.16305 | -0.00209 | -1.64404 |
| 18 | C | -1.73823 | -0.00164 | -1.48538 |
| 19 | C | -5.39929 | -0.00193 | -0.60408 |
| 20 | C | -5.96569 | -0.00295 | -1.88733 |
| 21 | C | -5.16023 | -0.00352 | -3.02245 |
| 22 | C | -3.77341 | -0.00311 | -2.90708 |
| 23 | C | -4.19475 | 0.00008  | 1.98087  |
| 24 | C | -5.62264 | -0.00038 | 1.82055  |
| 25 | C | -6.19752 | -0.00133 | 0.58979  |
| 26 | C | -1.38991 | 0.00089  | 2.23317  |
| 27 | C | -2.20187 | 0.00141  | 3.36399  |

|    |    |          |          |          |
|----|----|----------|----------|----------|
| 28 | C  | -3.58691 | 0.00103  | 3.24435  |
| 29 | C  | -0.83350 | -3.09319 | -0.21621 |
| 30 | C  | -0.83567 | 3.09219  | -0.21737 |
| 31 | C  | 4.29536  | 2.90426  | 0.00960  |
| 32 | C  | 4.29750  | -2.90115 | 0.01060  |
| 33 | F  | 4.11015  | -0.00005 | 1.16400  |
| 34 | H  | -1.12253 | -0.00210 | -2.37870 |
| 35 | H  | -7.04561 | -0.00328 | -1.98772 |
| 36 | H  | -5.61722 | -0.00431 | -4.00534 |
| 37 | H  | -3.15256 | -0.00356 | -3.79628 |
| 38 | H  | -6.23873 | 0.00004  | 2.71329  |
| 39 | H  | -7.27744 | -0.00167 | 0.48821  |
| 40 | H  | -0.31314 | 0.00119  | 2.34897  |
| 41 | H  | -1.74641 | 0.00212  | 4.34753  |
| 42 | H  | -4.21045 | 0.00145  | 4.13171  |
| 43 | H  | -0.83140 | -4.17927 | -0.12583 |
| 44 | H  | -1.45084 | -2.68517 | 0.58601  |
| 45 | H  | -1.31640 | -2.83213 | -1.16073 |
| 46 | H  | -1.31862 | 2.82867  | -1.16116 |
| 47 | H  | -1.45255 | 2.68556  | 0.58593  |
| 48 | H  | -0.83427 | 4.17847  | -0.12938 |
| 49 | H  | 4.40216  | 3.98507  | 0.07972  |
| 50 | H  | 4.77658  | 2.43518  | 0.87033  |
| 51 | H  | 4.81813  | 2.54982  | -0.88240 |
| 52 | H  | 4.82896  | -2.51377 | -0.86206 |
| 53 | H  | 4.76805  | -2.46156 | 0.89287  |
| 54 | H  | 4.40646  | -3.98343 | 0.04515  |
| 55 | F  | 4.22272  | 0.00249  | -1.12536 |
| 56 | Br | 1.78840  | 5.25140  | -0.10669 |
| 57 | Br | 1.79200  | -5.25049 | -0.10540 |

#### 4) Optimized geometry of PY-BDP-2I

|    |   |          |          |          |
|----|---|----------|----------|----------|
| 1  | C | -1.22530 | -0.84382 | -0.14746 |
| 2  | N | -1.24916 | -2.24388 | -0.08527 |
| 3  | B | -0.00011 | -3.16431 | -0.06430 |
| 4  | N | 1.24901  | -2.24399 | -0.08531 |
| 5  | C | 1.22527  | -0.84394 | -0.14745 |
| 6  | C | 0.00001  | -0.15252 | -0.18385 |
| 7  | C | -2.58178 | -0.37150 | -0.15601 |
| 8  | C | -3.36543 | -1.52303 | -0.09697 |
| 9  | C | -2.53086 | -2.66441 | -0.05554 |
| 10 | C | 2.53068  | -2.66465 | -0.05558 |
| 11 | C | 3.36534  | -1.52335 | -0.09693 |
| 12 | C | 2.58178  | -0.37174 | -0.15593 |
| 13 | C | 0.00008  | 1.34204  | -0.27048 |
| 14 | C | -0.00002 | 2.14258  | 0.93981  |
| 15 | C | 0.00005  | 3.56838  | 0.81317  |
| 16 | C | 0.00021  | 4.18168  | -0.47658 |

|    |   |          |          |          |
|----|---|----------|----------|----------|
| 17 | C | 0.00032  | 3.36935  | -1.65055 |
| 18 | C | 0.00025  | 1.94137  | -1.49845 |
| 19 | C | 0.00028  | 5.60601  | -0.59914 |
| 20 | C | 0.00045  | 6.18006  | -1.88312 |
| 21 | C | 0.00055  | 5.37725  | -3.02548 |
| 22 | C | 0.00049  | 3.98561  | -2.91480 |
| 23 | C | -0.00006 | 4.38744  | 1.98649  |
| 24 | C | 0.00001  | 5.81880  | 1.83285  |
| 25 | C | 0.00017  | 6.40127  | 0.59995  |
| 26 | C | -0.00017 | 1.57522  | 2.22721  |
| 27 | C | -0.00027 | 2.38386  | 3.36561  |
| 28 | C | -0.00021 | 3.77368  | 3.25124  |
| 29 | C | -3.08412 | 1.03842  | -0.21616 |
| 30 | C | 3.08424  | 1.03815  | -0.21599 |
| 31 | C | 2.92898  | -4.09970 | 0.03336  |
| 32 | C | -2.92951 | -4.09937 | 0.03330  |
| 33 | F | -0.00011 | -3.95266 | 1.09969  |
| 34 | H | 0.00032  | 1.32848  | -2.39641 |
| 35 | H | 0.00050  | 7.26258  | -1.97893 |
| 36 | H | 0.00069  | 5.83922  | -4.00838 |
| 37 | H | 0.00057  | 3.36671  | -3.80804 |
| 38 | H | -0.00007 | 6.43262  | 2.72970  |
| 39 | H | 0.00022  | 7.48378  | 0.50341  |
| 40 | H | -0.00021 | 0.49577  | 2.33864  |
| 41 | H | -0.00038 | 1.92273  | 4.34883  |
| 42 | H | -0.00029 | 4.39495  | 4.14283  |
| 43 | H | -4.17212 | 1.05149  | -0.12814 |
| 44 | H | -2.67168 | 1.65147  | 0.58981  |
| 45 | H | -2.81528 | 1.52204  | -1.16034 |
| 46 | H | 2.81575  | 1.52173  | -1.16030 |
| 47 | H | 2.67157  | 1.65128  | 0.58979  |
| 48 | H | 4.17221  | 1.05115  | -0.12761 |
| 49 | H | 3.84860  | -4.27257 | -0.53115 |
| 50 | H | 3.12669  | -4.37570 | 1.07675  |
| 51 | H | 2.14592  | -4.75484 | -0.34712 |
| 52 | H | -2.14541 | -4.75491 | -0.34425 |
| 53 | H | -3.13060 | -4.37444 | 1.07628  |
| 54 | H | -3.84741 | -4.27259 | -0.53393 |
| 55 | F | -0.00019 | -4.00221 | -1.19731 |
| 56 | I | 5.47365  | -1.61393 | -0.05555 |
| 57 | I | -5.47372 | -1.61361 | -0.05570 |

#### 5) Optimized geometry of BEN-BDP-2I

|   |   |          |          |         |
|---|---|----------|----------|---------|
| 1 | C | 1.22575  | 0.23789  | 0.02951 |
| 2 | N | 1.24847  | -1.16368 | 0.02401 |
| 3 | B | -0.00052 | -2.08323 | 0.06171 |
| 4 | N | -1.24946 | -1.16275 | 0.04725 |
| 5 | C | -1.22565 | 0.23862  | 0.02793 |



|    |   |          |          |          |
|----|---|----------|----------|----------|
| 6  | C | 0.00018  | 0.93034  | 0.02967  |
| 7  | C | 2.58288  | 0.70818  | 0.02872  |
| 8  | C | 3.36514  | -0.44598 | 0.01229  |
| 9  | C | 2.52954  | -1.58689 | 0.01207  |
| 10 | C | -2.53060 | -1.58521 | 0.03415  |
| 11 | C | -3.36538 | -0.44395 | 0.00232  |
| 12 | C | -2.58230 | 0.70964  | -0.00470 |
| 13 | C | 0.00033  | 2.42572  | 0.02325  |
| 14 | C | 0.11004  | 3.12854  | -1.18514 |
| 15 | C | 0.10718  | 4.52597  | -1.18979 |
| 16 | C | 0.00093  | 5.23237  | 0.01259  |
| 17 | C | -0.10574 | 4.53518  | 1.22033  |
| 18 | C | -0.10927 | 3.13774  | 1.22634  |
| 19 | C | 3.09279  | 2.11708  | 0.04304  |
| 20 | C | -3.08948 | 2.11916  | -0.03913 |
| 21 | C | -2.92783 | -3.02335 | 0.02572  |
| 22 | I | 5.47341  | -0.53775 | -0.03319 |
| 23 | C | 2.92567  | -3.02498 | -0.02096 |
| 24 | F | -0.01184 | -2.93027 | -1.06016 |
| 25 | F | 0.01041  | -2.86219 | 1.23615  |
| 26 | H | 0.19417  | 2.58091  | -2.11964 |
| 27 | H | 0.18951  | 5.06074  | -2.13158 |
| 28 | H | 0.00124  | 6.31842  | 0.00846  |
| 29 | H | -0.18775 | 5.07714  | 2.15803  |
| 30 | H | -0.19356 | 2.59724  | 2.16496  |
| 31 | H | 4.16883  | 2.12186  | 0.22810  |
| 32 | H | 2.91581  | 2.61918  | -0.91399 |
| 33 | H | 2.60890  | 2.71870  | 0.81558  |
| 34 | H | -2.61781 | 2.70327  | -0.83293 |
| 35 | H | -4.16836 | 2.12332  | -0.20608 |
| 36 | H | -2.89345 | 2.64087  | 0.90322  |
| 37 | H | -3.85233 | -3.16347 | 0.59130  |
| 38 | H | -3.11599 | -3.36030 | -1.00137 |
| 39 | H | -2.14791 | -3.65434 | 0.45095  |
| 40 | H | 2.14862  | -3.66183 | 0.40090  |
| 41 | H | 3.10478  | -3.34677 | -1.05454 |
| 42 | H | 3.85449  | -3.17428 | 0.53493  |
| 43 | I | -5.47362 | -0.53742 | -0.04449 |

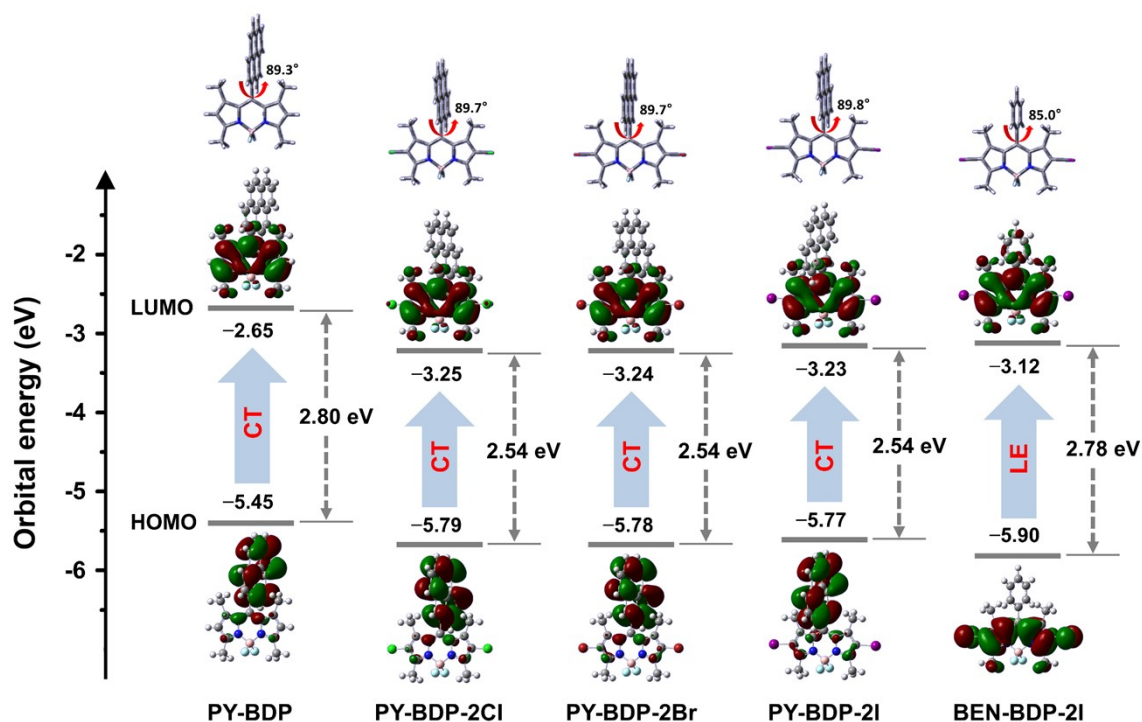

**Fig. S21.** The optimized geometry and frontier molecular orbitals of photosensitizers with transition types of charge transfer (CT) or locally excited (LE)

|            | S <sub>1</sub> HONTO | S <sub>1</sub> LUNTO | S <sub>2</sub> HONTO | S <sub>2</sub> LUNTO | T <sub>1</sub> HONTO | T <sub>1</sub> LUNTO |
|------------|----------------------|----------------------|----------------------|----------------------|----------------------|----------------------|
| PY-BDP     |                      | 99.18%<br>CT<br>     |                      | 98.36%<br>LE<br>     |                      | 100.91%<br>LE<br>    |
| PY-BDP-2Cl |                      | 99.06%<br>CT<br>     |                      | 99.94%<br>LE<br>     |                      | 101.70%<br>LE<br>    |
| PY-BDP-2Br |                      | 99.03%<br>CT<br>     |                      | 99.10%<br>LE<br>     |                      | 101.14%<br>LE<br>    |
| PY-BDP-2I  |                      | 98.95%<br>CT<br>     |                      | 98.72%<br>LE<br>     |                      | 100.44%<br>LE<br>    |
| BEN-BDP-2I |                      | 100.29%<br>LE<br>    |                      | 99.41%<br>LE<br>     |                      | 101.75%<br>LE<br>    |

**Fig. S22.** Highest occupied natural transition orbital (HONTO) and lowest unoccupied natural transition orbital (LUNTO) of compounds.

## 8. Spin-orbit coupling matrix element (SOCME) calculation

**Table S3.** Spin-orbit coupling matrix element (SOCME) calculated between singlet and triplet state of compounds

| Compound   | Singlet state  | Triplet state  | X-component (cm <sup>-1</sup> ) | Y-component (cm <sup>-1</sup> ) | Z-component (cm <sup>-1</sup> ) | SOCME <sup>a</sup> (cm <sup>-1</sup> ) |
|------------|----------------|----------------|---------------------------------|---------------------------------|---------------------------------|----------------------------------------|
| PY-BDP     | S <sub>0</sub> | T <sub>1</sub> | 0.06                            | 0                               | 0.24                            | 0.25                                   |
|            | S <sub>1</sub> | T <sub>1</sub> | 0                               | 0.62                            | 0                               | 0.62                                   |
|            | S <sub>1</sub> | T <sub>2</sub> | 0.33                            | 0                               | -0.52                           | 0.61                                   |
| PY-BDP-2Cl | S <sub>0</sub> | T <sub>1</sub> | 0.04                            | 0.01                            | 0.14                            | 0.14                                   |
|            | S <sub>1</sub> | T <sub>1</sub> | 0                               | -0.88                           | 0                               | 0.88                                   |
|            | S <sub>1</sub> | T <sub>2</sub> | -0.18                           | 0                               | 0.13                            | 0.22                                   |
| PY-BDP-2Br | S <sub>0</sub> | T <sub>1</sub> | 0.04                            | 0.08                            | 1.31                            | 1.31                                   |
|            | S <sub>1</sub> | T <sub>1</sub> | 0                               | -3.56                           | 0                               | 3.56                                   |
|            | S <sub>1</sub> | T <sub>2</sub> | 0.32                            | 0                               | 0.17                            | 0.36                                   |
| PY-BDP-2I  | S <sub>0</sub> | T <sub>1</sub> | 0                               | -2.03                           | 4.37                            | 4.82                                   |
|            | S <sub>1</sub> | T <sub>1</sub> | 8.48                            | 0                               | 0                               | 8.48                                   |
|            | S <sub>1</sub> | T <sub>2</sub> | 0                               | 1.16                            | 0.06                            | 1.16                                   |

<sup>a</sup> It was calculated through the formula of  $SOC = \sqrt{X^2 + Y^2 + Z^2}$  using the components of each axis value.

## 9. Triplet-triplet annihilation upconversion (TTA-UC)

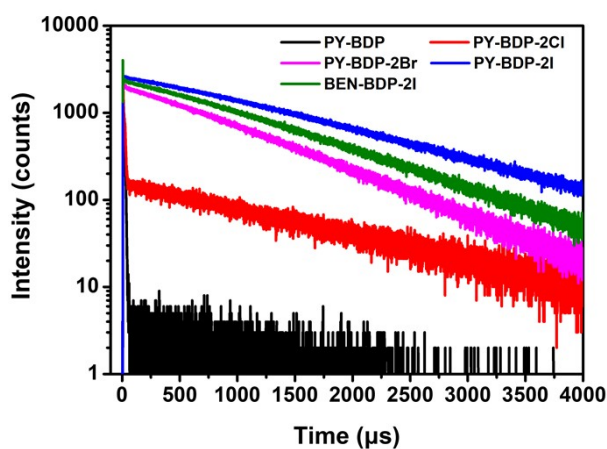

**Fig. S23.** The upconversion emission decay profiles of triplet photosensitizers (10  $\mu M$ ) and perylene (56  $\mu M$ ) in deoxygenated toluene were measured at 470 nm.

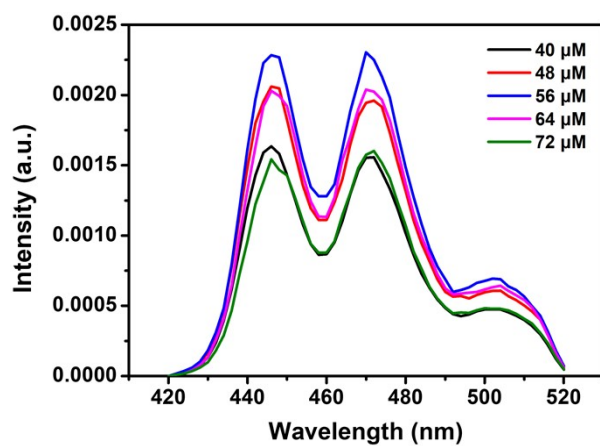

**Fig. S24.** UC emission spectra of PY-BDP-2I with various concentrations of perylene. The sensitizer concentration was fixed at 10  $\mu\text{M}$ , while the concentrations of perylene were selected as 40, 48, 56, 64, and 72  $\mu\text{M}$ .
